# Supplementary material for: Insights into the structural variations in SmNb1−xTaxO4 and HoNb1−xTaxO4 combined experimental and computational studies
Source: Royal Society of Chemistry journal article supplement (doi:10.1039/d1dt01051d), 2021-01-01
Supplement: d1dt01051d3.pdf [file d1dt01051d3.pdf]

## Supplementary Files

### **Insights into the Structural Variations in $\text{SmNb}_{1-x}\text{Ta}_x\text{O}_4$ and $\text{HoNb}_{1-x}\text{Ta}_x\text{O}_4$ a combined Experimental and Computational Studies**

Bryce Mullens<sup>1</sup>, Maxim Avdeev<sup>1,2</sup>, Helen E. A. Brand<sup>3</sup>, S. Mondal<sup>4</sup>, G. Vaitheeswaran<sup>5\*</sup> and  
Brendan J. Kennedy<sup>1\*</sup>

1. School of Chemistry, The University of Sydney, Sydney, New South Wales 2006, Australia
2. Australian Nuclear Science and Technology Organisation, Lucas Heights, New South Wales 2234, Australia
3. Australian Synchrotron, 800 Blackburn Road, Clayton, Victoria 3168, Australia
4. Advanced Centre of Research in High Energy Materials (ACRHEM), University of Hyderabad, Prof. C. R. Rao Road, Gachibowli, Hyderabad 500 046, Telangana, India.
5. School of Physics, University of Hyderabad, Prof. C. R. Rao Road, Gachibowli, Hyderabad 500 046, Telangana, India.

\* corresponding Authors: G. Vaitheeswaran ([vaithee@uohyd.ac.in](mailto:vaithee@uohyd.ac.in)) and Brendan J. Kennedy ([Brendan.Kennedy@Sydney.edu.au](mailto:Brendan.Kennedy@Sydney.edu.au))

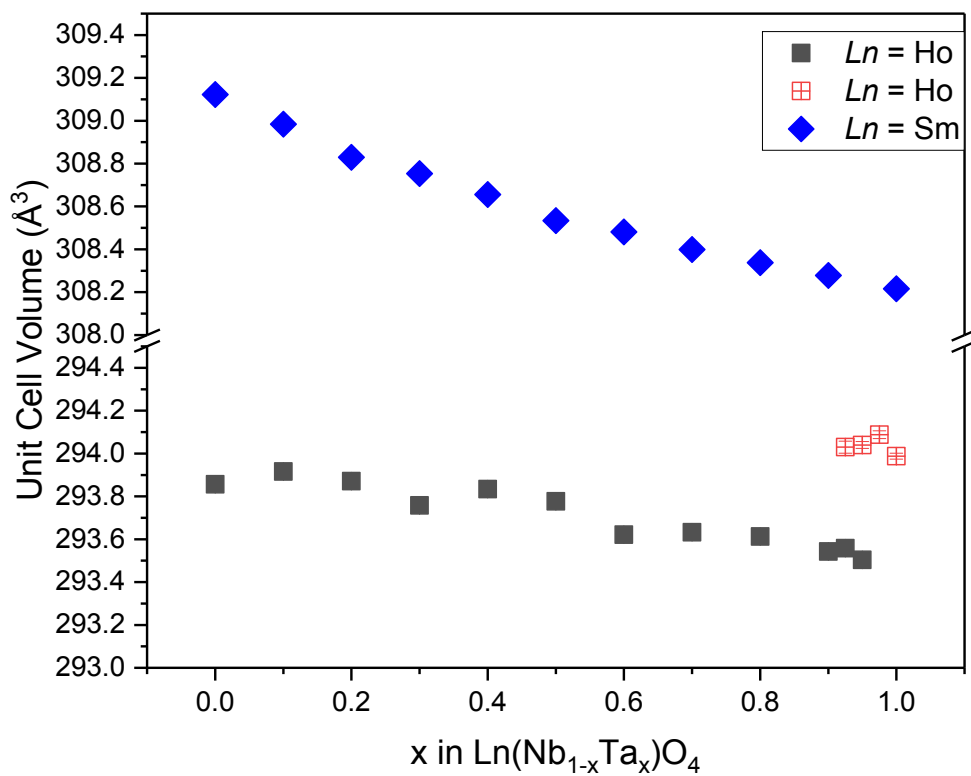

**Figure S1.** Composition dependence of the unit cell volume for the two series  $LnNb_{1-x}Ta_xO_4$ . The values for  $Ln = Sm$  are from refinements against S-XRD data and those from  $Ln = Ho$  from PND data. The closed symbols are from refinements in  $I2/a$  and the open symbols are the values for the structure refined in  $P2/c$  multiplied by 2.

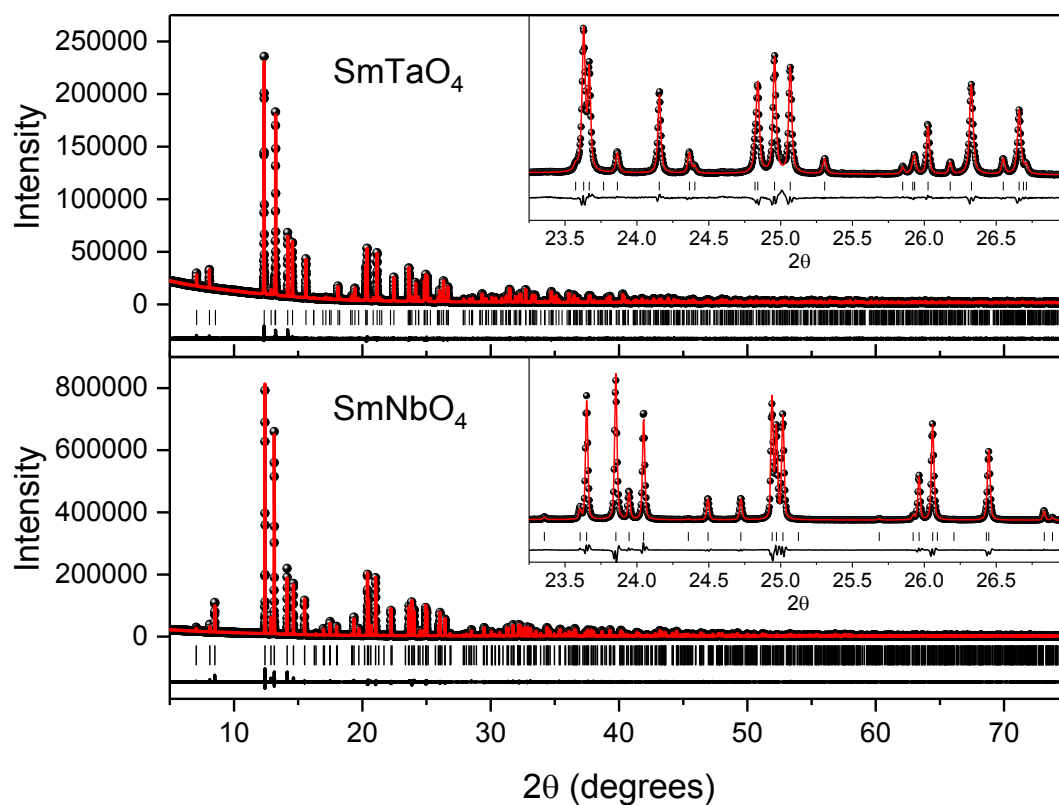

**Figure S2.** Examples of the Rietveld refinements for  $\text{SmTaO}_4$  and  $\text{SmNbO}_4$ . The data are represented by the black spheres, the red line is the calculated profile and the lower blue line the difference between the observed and calculated profiles. The short vertical markers show the positions of the space group allowed Bragg reflections. The insets highlight the fits to the regions illustrated in Figure 1.

**Table S1.** Refined Structural parameters for SmNbO<sub>4</sub>:Space group *I2/a*a = 5.420642(6), b = 11.175430(14), c = 5.119937(6) Å, β = 94.67780(10)<sup>0</sup>,Cell volume = 309.1225(6) Å<sup>3</sup>

| Name | x         | y           | z         | U <sub>i</sub> *100 Å <sup>2</sup> |
|------|-----------|-------------|-----------|------------------------------------|
| Sm1  | ¼         | 0.12078(4)  | 0         | 0.284(6)                           |
| Nb1  | ¼         | 0.64619(4)  | 0         | 1.219(14)                          |
| O1   | 0.0076(4) | 0.71551(20) | 0.2029(5) | 1.21(6)                            |
| O2   | 0.9039(4) | 0.45567(20) | 0.2463(4) | 0.91(5)                            |

Atomic positions in SmNbO<sub>4</sub> obtained from theoretical calculations:

|     | PBE                    | PBEsol                 |
|-----|------------------------|------------------------|
| Sm1 | (¼ 0.1220 0.0)         | (¼ 0.1204 0.0)         |
| Nb1 | (¼ 0.6414 0.0)         | (¼ 0.6466 0.0)         |
| O1  | (0.0025 0.7168 0.1957) | (0.0067 0.7190 0.2114) |
| O2  | (0.9060 0.4586 0.2477) | (0.9053 0.4597 0.2458) |

**Table S2.** Refined Structural parameters for SmTaO<sub>4</sub>:Space group *I2/a*a = 5.458786(9) b = 11.141779(17) c = 5.093315(9) Å, β = 95.75670(10)<sup>0</sup>Cell volume = 308.2161(9) Å<sup>3</sup>

| Name | x         | y            | z         | U <sub>i</sub> *100 Å <sup>2</sup> |
|------|-----------|--------------|-----------|------------------------------------|
| Sm1  | ¼         | 0.11816(4)   | 0         | 0.231(8)                           |
| Ta1  | ¼         | 0.650607(24) | 0         | 0.171(7)                           |
| O1   | 0.0168(6) | 0.71626(24)  | 0.2161(7) | 0.54(7)                            |
| O2   | 0.9011(6) | 0.45393(25)  | 0.2411(7) | 0.75(8)                            |

Atomic positions in SmTaO<sub>4</sub> obtained from theoretical calculations:

|     | PBE                    | PBEsol                 |
|-----|------------------------|------------------------|
| Sm1 | (¼ 0.1183 0.0)         | (¼ 0.1177 0.0)         |
| Ta1 | (¼ 0.6504 0.0)         | (¼ 0.6517 0.0)         |
| O1  | (0.0105 0.7184 0.2167) | (0.0118 0.7195 0.2218) |
| O2  | (0.9022 0.4570 0.2435) | (0.9027 0.4587 0.2435) |

**Table S3.** Refined Structural parameters for HoNbO<sub>4</sub>:Space group *I2/a* $a = 5.30221(8)$ ,  $b = 10.95710(20)$ ,  $c = 5.07411(9)$  Å,  $\beta = 94.5622(13)^\circ$ Cell volume = 293.856(9) Å<sup>3</sup>

| Name | <i>x</i>    | <i>y</i>    | <i>z</i>    | U <sub>i</sub> *100 Å <sup>2</sup> |
|------|-------------|-------------|-------------|------------------------------------|
| Ho1  | ¼           | 0.12099(12) | 0           | 0.042(24)                          |
| Nb1  | ¼           | 0.64372(13) | 0           | 0.314(35)                          |
| O1   | 0.00398(26) | 0.71807(11) | 0.20964(25) | 0.533(25)                          |
| O2   | 0.90787(26) | 0.46015(12) | 0.24747(25) | 0.623(26)                          |

Atomic positions in HoNbO<sub>4</sub> obtained from theoretical calculations:

|     | PBE                    | PBEsol                 |
|-----|------------------------|------------------------|
| Ho1 | (¼ 0.1218 0.0)         | (¼ 0.1211 0.0)         |
| Nb1 | (¼ 0.6417 0.0)         | (¼ 0.6431 0.0)         |
| O1  | (0.9990 0.7176 0.2051) | (0.0010 0.7193 0.2120) |
| O2  | (0.9111 0.4608 0.2521) | (0.9130 0.4630 0.2512) |

**Table S4a.** Refined Structural parameters for *P2/c* phase of HoTaO<sub>4</sub>:Space Group *P2/c* $a = 5.11450(15)$ ,  $b = 5.45546(16)$ ,  $c = 5.30199(13)$  Å,  $\beta = 96.4704(21)^\circ$ Cell volume = 146.994(7) Å<sup>3</sup>

| Atom | <i>x</i>  | <i>y</i>    | <i>z</i>  | U <sub>i</sub> *100 Å <sup>2</sup> |
|------|-----------|-------------|-----------|------------------------------------|
| Ho1  | ½         | 0.73345(32) | ¼         | -0.10(4)                           |
| Ta1  | 0         | 0.1945(4)   | ¼         | 0.78(6)                            |
| O1   | 0.2491(4) | 0.4171(4)   | 0.3987(4) | 0.72(4)                            |
| O2   | 0.2316(4) | 0.0617(4)   | 0.0041(4) | 0.74(4)                            |

Atomic positions in *P2/c* phase of HoTaO<sub>4</sub> obtained from theoretical calculations:

|     | PBE                    | PBEsol                 |
|-----|------------------------|------------------------|
| Ho1 | (½ 0.7328 ¼)           | (½ 0.7349 ¼)           |
| Ta1 | (0.0 0.1943 ¼)         | (0.0 0.1964 ¼)         |
| O1  | (0.2510 0.4161 0.4008) | (0.2509 0.4223 0.4027) |
| O2  | (0.2326 0.0640 0.0051) | (0.2349 0.0597 0.0097) |

**Table S4b.** Refined Structural parameters for  $I2/a$  phase of  $\text{HoTaO}_4$ :

Space Group  $I2/a$

$a = 5.33007(6)$ ,  $b = 10.93577(16)$ ,  $c = 5.05479(8)$  Å,  $\beta = 95.5415(11)^\circ$

Cell volume =  $293.259(7)$  Å<sup>3</sup>

| Atom | $x$           | $y$         | $z$       | $U_i \cdot 100$ Å <sup>2</sup> |
|------|---------------|-------------|-----------|--------------------------------|
| Ho1  | $\frac{1}{4}$ | 0.11879(12) | 0         | -0.02(2)                       |
| Ta1  | $\frac{1}{4}$ | 0.64805(12) | 0         | 0.21(3)                        |
| O1   | 0.0077(3)     | 0.71852(10) | 0.2205(3) | 0.51(3)                        |
| O2   | 0.9078(2)     | 0.46072(13) | 0.2463(3) | 0.52(3)                        |

Atomic positions in  $I2/a$  phase of  $\text{HoTaO}_4$  obtained from theoretical calculations:

|     | PBE                         | PBEsol                      |
|-----|-----------------------------|-----------------------------|
| Ho1 | ( $\frac{1}{4}$ 0.1184 0.0) | ( $\frac{1}{4}$ 0.1180 0.0) |
| Ta1 | ( $\frac{1}{4}$ 0.6483 0.0) | ( $\frac{1}{4}$ 0.6490 0.0) |
| O1  | (0.0052 0.7185 0.2200)      | (0.0060 0.7198 0.2239)      |
| O2  | (0.9081 0.4598 0.2487)      | (0.9085 0.4619 0.2488)      |

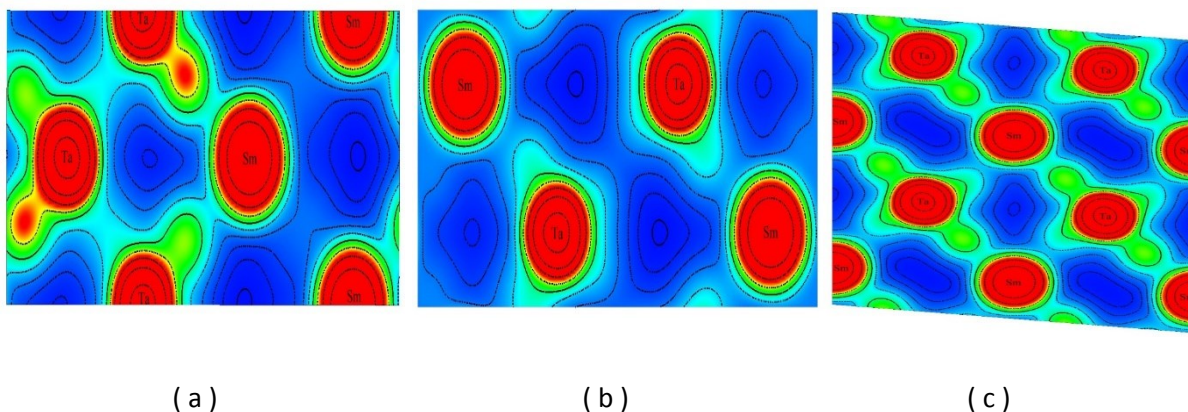

**Figure S3.** Electron charge density plot of  $\text{SmTaO}_4$  in 100 (a), 001 (b) and 010 (c) planes.

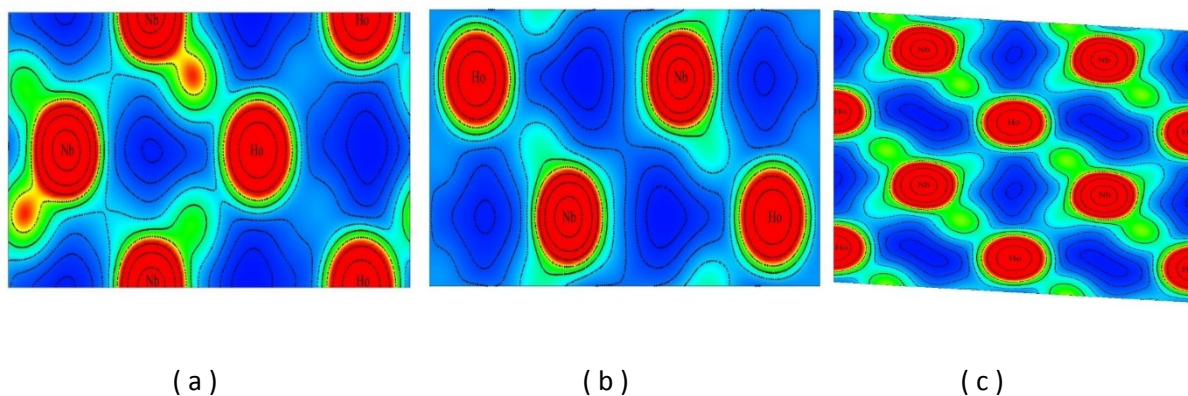

**Figure S4.** Electron charge density plot of  $\text{HoNbO}_4$  in 100 (a), 001 (b) and 010 (c) planes.

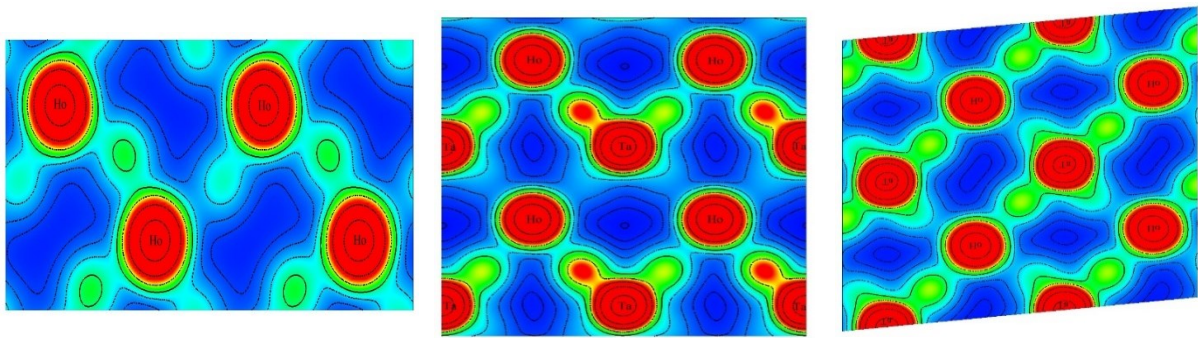

(a)

(b)

(c)

**Figure S5.** Electron charge density plot of  $P2/c$  phase of  $\text{HoTaO}_4$  in 100 (a), 001 (b) and 010 (c) planes.

**Table S5.** Calculated Born effective charge (BEC) of the studied materials.

|                               | Z <sub>11</sub> | Z <sub>12</sub> | Z <sub>13</sub> | Z <sub>21</sub> | Z <sub>22</sub> | Z <sub>23</sub> | Z <sub>31</sub> | Z <sub>32</sub> | Z <sub>33</sub> |
|-------------------------------|-----------------|-----------------|-----------------|-----------------|-----------------|-----------------|-----------------|-----------------|-----------------|
| SmNbO <sub>4</sub>            |                 |                 |                 |                 |                 |                 |                 |                 |                 |
| Sm                            | 4.81            | 0.00            | 0.36            | 0.00            | 4.04            | 0.00            | -0.19           | 0.00            | 4.41            |
| Nb                            | 4.54            | 0.00            | -0.23           | 0.00            | 5.32            | 0.00            | 0.34            | 0.00            | 6.67            |
| O1                            | -2.70           | 0.39            | 0.83            | 0.43            | -2.11           | -0.46           | 0.86            | -0.56           | -2.67           |
| O2                            | -1.98           | 0.34            | -0.89           | 0.26            | -2.57           | 1.16            | -0.94           | 1.12            | -2.87           |
| SmTaO <sub>4</sub>            |                 |                 |                 |                 |                 |                 |                 |                 |                 |
| Sm                            | 4.74            | 0.00            | 0.33            | 0.00            | 3.99            | 0.00            | -0.06           | 0.00            | 4.19            |
| Ta                            | 4.38            | 0.00            | -0.03           | 0.00            | 5.42            | 0.00            | 0.39            | 0.00            | 6.82            |
| O1                            | -2.58           | 0.26            | 0.68            | 0.21            | -2.09           | -0.47           | 0.71            | -0.56           | -2.70           |
| O2                            | -1.98           | 0.27            | -0.83           | 0.20            | -2.61           | 1.11            | -0.87           | 1.11            | -2.80           |
| HoNbO <sub>4</sub>            |                 |                 |                 |                 |                 |                 |                 |                 |                 |
| Ho                            | 4.68            | 0.00            | 0.35            | 0.00            | 3.94            | 0.00            | -0.22           | 0.00            | 4.40            |
| Nb                            | 4.66            | 0.00            | -0.25           | 0.00            | 5.39            | 0.00            | 0.36            | 0.00            | 6.58            |
| O1                            | -2.65           | 0.38            | 0.80            | 0.44            | -2.14           | -0.47           | 0.83            | -0.59           | -2.64           |
| O2                            | -2.02           | 0.37            | -0.85           | 0.28            | -2.53           | 1.10            | -0.90           | 1.00            | -2.86           |
| HoTaO <sub>4</sub> (I2/a #15) |                 |                 |                 |                 |                 |                 |                 |                 |                 |
| Ho                            | 4.62            | 0.00            | 0.30            | 0.00            | 3.89            | 0.00            | -0.07           | 0.00            | 4.19            |
| Ta                            | 4.43            | 0.00            | -0.06           | 0.00            | 5.30            | 0.00            | 0.36            | 0.00            | 6.64            |
| O1                            | -2.55           | 0.26            | 0.69            | 0.24            | -2.08           | -0.45           | 0.72            | -0.57           | -2.65           |
| O2                            | -1.97           | 0.30            | -0.81           | 0.24            | -2.52           | 1.05            | -0.86           | 0.98            | -2.77           |
| HoTaO <sub>4</sub> (P2/c #13) |                 |                 |                 |                 |                 |                 |                 |                 |                 |
| Ho                            | 4.72            | 0.00            | 0.15            | 0.00            | 3.88            | 0.00            | 0.17            | 0.00            | 4.13            |
| Ta                            | 5.49            | 0.00            | 0.38            | 0.00            | 5.48            | 0.00            | 0.47            | 0.00            | 5.40            |
| O1                            | -2.58           | -1.07           | -0.85           | -1.15           | -2.59           | -0.31           | -0.93           | -0.28           | -2.16           |
| O2                            | -2.53           | 0.05            | 0.58            | -0.03           | -2.10           | -0.51           | 0.61            | -0.51           | -2.60           |

**Table S6.** Calculated Theoretical IR frequencies (cm<sup>-1</sup>) of both phases of HoTaO<sub>4</sub>.

| Mode | <i>P2/c</i> (#13) |              |  | <i>I2/a</i> (#15) |              |  |
|------|-------------------|--------------|--|-------------------|--------------|--|
|      | Assignment        | IR Frequency |  | Assignment        | IR Frequency |  |
|      |                   | Calc         |  |                   | Calc         |  |
| 1    | B <sub>u</sub>    | 121.56194    |  | A <sub>u</sub>    | 125.17394    |  |
| 2    | A <sub>u</sub>    | 126.98389    |  | B <sub>u</sub>    | 150.48888    |  |
| 3    | B <sub>u</sub>    | 147.06390    |  | B <sub>u</sub>    | 156.95743    |  |
| 4    | B <sub>u</sub>    | 195.36492    |  | B <sub>u</sub>    | 163.10587    |  |
| 5    | B <sub>u</sub>    | 250.17932    |  | B <sub>u</sub>    | 182.86437    |  |
| 6    | A <sub>u</sub>    | 261.49906    |  | A <sub>u</sub>    | 249.35075    |  |
| 7    | B <sub>u</sub>    | 293.03075    |  | A <sub>u</sub>    | 278.86244    |  |
| 8    | A <sub>u</sub>    | 305.56532    |  | B <sub>u</sub>    | 323.48339    |  |
| 9    | A <sub>u</sub>    | 366.78297    |  | B <sub>u</sub>    | 375.90099    |  |
| 10   | B <sub>u</sub>    | 395.72693    |  | A <sub>u</sub>    | 419.14108    |  |



|    |                |           |  |                |           |  |
|----|----------------|-----------|--|----------------|-----------|--|
| 11 | B <sub>u</sub> | 513.69592 |  | A <sub>u</sub> | 526.76985 |  |
| 12 | A <sub>u</sub> | 523.38975 |  | B <sub>u</sub> | 529.39155 |  |
| 13 | A <sub>u</sub> | 596.08742 |  | A <sub>u</sub> | 622.71795 |  |
| 14 | B <sub>u</sub> | 638.07138 |  | B <sub>u</sub> | 644.51443 |  |
| 15 | A <sub>u</sub> | 769.40085 |  | A <sub>u</sub> | 774.41647 |  |

**Table S7.** Calculated and experimentally obtained atomic positions of SmNbO<sub>4</sub>, SmTaO<sub>4</sub>, HoNbO<sub>4</sub> and P2/c and I2/a phases of HoTaO<sub>4</sub>:

SmNbO<sub>4</sub>:

|    | Expt.                     | PBE                       | PBEsol                    |
|----|---------------------------|---------------------------|---------------------------|
| Sm | (0.25 0.12078 0.00)       | (0.25 0.12199 0.00)       | (0.25 0.12041 0.00)       |
| Nb | (0.25 0.64619 0.00)       | (0.25 0.64136 0.00)       | (0.25 0.6466 0.00)        |
| O1 | (0.00760 0.71551 0.20290) | (0.00251 0.71679 0.19574) | (0.00665 0.71901 0.21137) |
| O2 | (0.90390 0.45567 0.24630) | (0.90600 0.45862 0.24770) | (0.90531 0.45972 0.24575) |

SmTaO<sub>4</sub>:

|    | Expt.                     | PBE                       | PBEsol                    |
|----|---------------------------|---------------------------|---------------------------|
| Sm | (0.25 0.11816 0.00)       | (0.25 0.11832 0.00)       | (0.25 0.11767 0.00)       |
| Ta | (0.25 0.65061 0.00)       | (0.25 0.65043 0.00)       | (0.25 0.65165 0.00)       |
| O1 | (0.01680 0.71626 0.21610) | (0.01046 0.71842 0.21665) | (0.0118 0.71952 0.2218)   |
| O2 | (0.90110 0.45393 0.24110) | (0.90216 0.45701 0.24348) | (0.90265 0.45868 0.24347) |

HoNbO<sub>4</sub>:

|    | Expt.                     | PBE                       | PBEsol                    |
|----|---------------------------|---------------------------|---------------------------|
| Ho | (0.25 0.12099 0.00)       | (0.25 0.12184 0.00)       | (0.25 0.12117 0.00)       |
| Nb | (0.25 0.64372 0.00)       | (0.25 0.64177 0.00)       | (0.25 0.6431 0.00)        |
| O1 | (0.00398 0.71807 0.20964) | (0.99897 0.71762 0.20505) | (0.00096 0.7193 0.21201)  |
| O2 | (0.90787 0.46015 0.24747) | (0.91111 0.46078 0.25212) | (0.91298 0.46301 0.25119) |

HoTaO<sub>4</sub> (P2/c):

|    | Expt.                  | PBE                       | PBEsol                   |
|----|------------------------|---------------------------|--------------------------|
| Ho | (0.50 0.73345 0.25)    | (0.50 0.73282 0.25)       | (0.50 0.73487 0.25)      |
| Ta | (0.00 0.19450 0.25)    | (0.00 0.19426 0.25)       | (0.00 0.19644 0.25)      |
| O1 | (0.2491 0.4171 0.3987) | (0.25101 0.41611 0.40080) | (0.2509 0.4223 0.40273)  |
| O2 | (0.2316 0.0617 0.0041) | (0.23255 0.06397 0.00513) | (0.23487 0.05969 0.0097) |

HoTaO<sub>4</sub>(I2/a):

|    | Expt.                    | PBE                      | PBEsol                    |
|----|--------------------------|--------------------------|---------------------------|
| Ho | (0.25 0.11879 0.00)      | (0.25 0.11841 0.00)      | (0.25 0.11803 0.00)       |
| Ta | (0.25 0.64805 0.00)      | (0.25 0.64831 0.00)      | (0.25 0.64899 0.00)       |
| O1 | (0.0077 0.71852 0.2205)  | (0.0052 0.71848 0.21996) | (0.00598 0.71975 0.22393) |
| O2 | (0.9078 0.46072 0.24072) | (0.9081 0.45984 0.24871) | (0.90851 0.46191 0.2488)  |
